# Supplementary material for: Ancient technology and punctuated change: Detecting the emergence of the Edomite Kingdom in the Southern Levant
Source: PLoS One. 2019 Sep 18;14(9):e0221967. doi: 10.1371/journal.pone.0221967 (PMC6750566; doi:10.1371/journal.pone.0221967)
Supplement: S1 Dataset — (XLSX) [file pone.0221967.s004.xlsx]

## Sheet: Previous Studies
Complete Data from Previous Elemental Analyses of Iron Age Slag from the Wadi Arabah
Source	Site	Sample	SiO2	TiO2	Al2O3	FeO	MnO	MgO	CaO	BaO	K2O	Na2O	P2O5	S	Ni	Cu	ZN	Pb	Method	Comments
Hauptmann 2007	Faynan 5	JD-1/40	26.4	0.25	5.01	2.17	37.4	1.37	15.3	1.28	3.06	<0.14	3.47	2.33	0.07	0.54	0.03	0.12	AAS	AAS - Atomic Absorption Spectrometry; Hauptman uses Fe2O3
Hauptmann 2007	KEN	JD-2/2a	29.8	0.23	5.05	3.32	41	1.38	7.55	0.56	2.75	0.5	3.4	0.76	0.07	0.36	0.04	0.02	AAS
Hauptmann 2007	KEN	JD-2/2b	32.1	0.2	4.6	3.61	37.5	1.28	9.18	0.48	2.19	1.03	2.48	1.8	0.08	0.4	0.02	0.02	AAS
Hauptmann 2007	KEN	JD-2/2c	34.3	0.22	4.93	3.34	39.5	1.11	5.76	0.72	1.78	0.44	1.45	0.83	0.09	0.31	0.02	0.02	AAS
Hauptmann 2007	KEN	JD-2/3	51.3	0.24	5.3	2.49	20.5	1.09	4.28	0.56	2.67	0.59	1.82	0.45	0.06	1.37	0.03	0.16	AAS
Hauptmann 2007	KEN	JD-2/5a	32.7	0.2	4.27	3.9	40.7	1.6	7.63	0.36	2.45	0.55	2.58	0.56	0.07	0.37	0.03	0.03	AAS
Hauptmann 2007	KEN	JD-2/5b	30.4	0.21	3.78	3.34	43.7	1.4	7.63	0.21	2.3	0.55	2.04	1.07	0.07	0.35	0.03	0.01	AAS
Hauptmann 2007	KEN	JD-2/6	33.5	0.26	5.53	3.73	36.8	1.47	7.48	0.43	2.95	0.85	2.17	0.98	0.07	0.59	0.03	0.09	AAS
Hauptmann 2007	KEN	JD-2/20b	30.4	0.2	4.4	5.35	40.2	0.77	7.29	0.95	2.22	<0.14	3.45	0.53	0.07	0.56	0.06	0.08	AAS
Hauptmann 2007	KEN	JD-2/20c	28.3	0.22	4.47	2.69	40.8	1.36	9.19	1.24	2.5	0.82	3.36	1.05	0.07	0.43	0.06	0.07	AAS
Hauptmann 2007	Ras en-Naqab	JD-5/3	33.3	0.25	5.59	3.38	28.6	3	13.4	1.64	1.97	0.42	2.01	<0.01	0.06	0.7	0.08	0.36	AAS
Hauptmann 2007	Ras en-Naqab	JD-5/3a	37.8	0.28	5.11	4.35	25	3.14	13.9	1.56	1.73	<0.14	2.33	0.03	0.07	0.83	0.08	0.39	AAS
Hauptmann 2007	Ras en-Naqab	JD-5/3b	33.7	0.25	5.01	3.53	24.4	2.75	12.4	1.63	1.65	<0.14	1.79	0.02	0.07	1.48	0.09	0.6	AAS
Hauptmann 2007	Ras en-Naqab	JD-5/3c	31.8	0.25	4.96	2.82	35	2.45	12	1.9	1.9	<0.14	1.74	0.1	0.07	0.38	0.06	0.39	AAS
Hauptmann 2007	Wadi Fidan 4	JD-8/1	25.3	0.32	6.43	2.1	34	1.46	16	0.68	3.59	<0.14	6.76	1.19	0.06	0.48	0.06	0.19	AAS
Hauptmann 2007	KAJ	JD-11/2	33.6	0.21	4.66	6.99	35.3	0.98	7.97	0.52	3.69	<0.14	3.46	0.61	0.07	0.61	0.05	0.04	AAS
Hauptmann 2007	Wadi Dana 1/6	JD-13/1b	29.9	0.16	2.43	4.35	49.2	0.92	5.26	0.39	0.61	0.61	0.28	0.58	0.08	1.47	0.07	0.02	AAS
Bachmann 1980	Timna 30	BR-A	36.5	1	2.7	43.2	9.2	-	5.3		-		0.5	-		1.4	0.1	0.1	XRF
Bachmann 1980	Timna 30	BR-B	40.4	0.8	2.4	39.1	9.2	-	5.1		-		0.3	-		2.4	0.1	0.1	XRF
Bachmann 1980	Timna 30	BR-C	39.9	0.8	1.9	40.8	10.3	-	4		-		0.3	-		1.5	0.1	0.1	XRF
Bachmann 1980	Timna 30	BR-D	38	0.8	2.4	42.9	8.2	-	5.4		-		0.7	-		0.8	0.1	-	XRF
Bachmann 1980	Timna 30	BR-E	32.7	0.7	2.2	45.8	7.4	-	3.9		-		0.5	-		2.1	0.2	0.1	XRF
Bachmann 1980	Timna 30	BR-F	36	0.8	2.4	42.7	8.1	-	4.2		-		0.5	-		2.9	0.2	0.1	XRF
Bachmann 1980	Timna 30	BR-G	48	0.3	1.6	39	1.7	-	5.5		-		-	-		2.4	0.3	0.1	XRF
Bachmann 1980	Timna 30	BR-I	41	0.7	2.8	39.1	8.6	-	5.2		-		0.3	-		0.9	0.1	0.1	XRF
Bachmann 1980	Timna 30	BR-K	38.5	1	1.6	40.5	9	-	5.4		-		0.2	-		1.5	0.1	0.1	XRF
Bachmann 1980	Timna 30	BR-L	37.5	0.7	2.2	44.4	7.1	-	4.2		-		0.4	-		1.7	0.1	0.1	XRF
Bachmann 1980	Timna 30	BR-M	38.3	0.8	2	36.5	10.9	-	5.9		-		0.5	-		1	0.1	-	XRF
Bachmann 1980	Timna 30	10	41.7	0.3	1	32.04	0.4		10.7					0.2		9.6		0.3	XRF
Bachmann 1980	Timna 30	2	42.4	3	3.8	3.9	32.5	-	8.9		0.6		3	0.6		0.4	-	-	XRF
Bachmann 1980	Timna 30	20	40.7	1.5	2.5	9	33.3		6.7		0.1		2	0.5		4	0.1	0.5	XRF
Bachmann 1980	Timna 30	25	44.5	1.7	2.9	6.1	36.5	-	5.4		-		-	0.3		0.5	0.1	0.1	XRF
Bachmann 1980	Timna 30	26/G1	40	n.a.	9	14	n.a.	n.a.	8		n.a.		n.a.	n.a.		n.a.	n.a.	n.a.	XRF
Bachmann 1980	Timna 30	26/Cr	40.2	2.2	2.7	7.5	38	-	6.9		0.1		3	0.5		0.8	0.1	0.4	XRF
Bachmann 1980	Timna 30	100	42.6	1.6	2.7	7.4	36	-	5.4		-		-	0.2		2	0.1	0.2	XRF
Bachmann 1980	Timna 2	LR1	32.7	n.a.	4.8	14.8	32.3	2.5	4.1		n.a.		n.a.	0.2		0.24	n.a.	n.a.	Undefined	Probably Early Islamic
Bachmann 1980	Timna 2	LR2	35.6	n.a.	4.1	6.5	40.4	1.5	4.6		n.a.		n.a.	0.13		0.27	n.a.	n.a.	Undefined	Probably Early Islamic
Bachmann 1980	Timna 2	LR3	29.7	n.a.	9.8	53.1	2.5	2.3	4.7		n.a.		n.a.	0.2		0.27	n.a.	n.a.	Undefined	Insecure date
Bachmann 1980	Timna 2	LR4	40.2	n.a.	2.2	43.3	1.7	0.5	9.3		n.a.		n.a.	0.1		0.61	n.a.	n.a.	Undefined	Insecure date
Bachmann 1980	Timna 2	LR5	35.7	n.a.	3.1	32.9	2.7	0.3	13.7		n.a.		n.a.	0.69		2.3	n.a.	n.a.	Undefined	Insecure date
Bachmann 1980	Timna 2	LR6	32.5	n.a.	2.9	46.2	0.4	4.7	2.3		n.a.		n.a.	0.14		3.8	n.a.	n.a.	Undefined	Insecure date
Bachmann 1980	Timna 2	LR7	36.1	n.a.	2.3	40.4	3.5	3.1	4.5		n.a.		n.a.	0.25		0.32	n.a.	n.a.	Undefined	Insecure date
Bachmann 1980	Timna 2	LR8	34.2	n.a.	9.6	36.5	7.6	1.6	5.2		n.a.		n.a.	0.17		0.28	n.a.		Undefined	Insecure date
Bachmann 1980	Timna 2	LR9	35.4	n.a.	4.1	52.4	0.7	1.4	4.9		n.a.		n.a.	0.3		0.85	n.a.	n.a.	Undefined	Insecure date
Lupu and Rothenberg 1970	Timna 2	Table 6	27.8		4.8	41.2	3.2	3.22	5.6
Rothenberg 1988	Timna 200 (Layer III)	152	36		3.02	42.05	0.3	0.8	5.8				1.17			3.52	0.11		XRF
Rothenberg 1988	Timna 200 (Layer III)	161\7	45.54		0.33	35.02	0.56	0.47	6.83				0.13			4.01			XRF
Rothenberg 1988	Timna 200 (Layer III)	161\5	33.69		1.81	44.1	0.29	1.98	11.64				0.15			1.58			XRF
Rothenberg 1988	Timna 200 (Layer III)	161\6	35.87		3.24	35	0.32	1.19	11.82				2.04			0.37			XRF
Rothenberg 1988	Timna 200 (Layer III)	163\3	53.46		0.28	33.39	0.06						0.28			0.47			XRF
Rothenberg 1988	Timna 200 (Layer II-III)	303\1	44.16		1.63	36.6	2.45	0.1	2.38				1.91			0.59			XRF
Rothenberg 1988	Timna 200 (Layer II-III)	303\3	65.25		0.7	27.65	0.25	0.1	1.94				0.45						XRF
Rothenberg 1988	Timna 200 (Layer II-III)	303\4	35.53		1.49	42.13	0.37	0.18	5.52				1.76			1.68			XRF
Rothenberg 1988	Timna 200 (Layer II)	312	36.68		1.82	37.37	0.36	2.21	12.47		0.49	0.67	1.97			1.3			XRF
Rothenberg 1988	Timna 200 (Layer II)	317\2	37.97		1.41	35.74	5.41	1.49	6.96		0.5	0.28	1.82			2.33			XRF
Rothenberg 1988	Timna 200 (Layer II)	318\1	50.28		2.28	32.62	0.12	0.39	6.08		0.61	0.27	1.59			2.14			XRF
Rothenberg 1988	Timna 200 (Layer II)	318\2	47.24		1.56	37.02	0.22	0.2	5.41		0.62	0.27	1.93			1.61			XRF
Rothenberg 1988	Timna 200 (Layer III)	319\1	37.78		1.29	44.5		0.86	6.15		0.38	0.46	2.15			1.31			XRF
Rothenberg 1988	Timna 200 (Layer III)	319\2	37.92		1.91	44.3		0.4	8.1		0.26	0.27	2.23			0.65			XRF
Rothenberg 1988	Timna 200 (Layer II)	322\1	40.2		2.27	42.09	0.13	1.58	6.67		0.26	0.27	1.92			3.08			XRF
Rothenberg 1988	Timna 200 (Layer II)	322\2	41.43		3.58	53.95	0.23	1.2	9.28		0.42	0.32	1.89			7.51			XRF
Rothenberg 1988	Timna 200 (Layer II)	322\3	43.06		3.2	34.54	0.16	1.21	8.21		0.26	0.23	1.86			2.73			XRF
Rothenberg 1988	Timna 200 (Layer II)	322\4	30.36		1.88	51	0.16	0.5	7.73		0.4	0.44	2.15			1.35			XRF
Rothenberg 1988	Timna 200 (Layer III)	323\1	40.66		2.76	37.32	1.2	0.58	5.87				1.27			0.44			XRF
Rothenberg 1988	Timna 200 (Layer III)	323\2	40.38		2.4	45.61	0.17	0.49	4.86				1.29			1.57			XRF
Rothenberg 1990	Site 30 (Layer II)	1309	31.9		1.2	37.3	1.3		2.5							3.1			XRF
Rothenberg 1990	Site 30 (Layer III)	1308	32.2		1	31.4	7.8		1.8							3.2			XRF
Rothenberg 1990	Site 2 (Layer II)	48A	45.2		8.4	21.4	0.2		4.9							6.3			XRF
Rothenberg 1990	Site 2 (Layer II)	98	37.2		1.8	41.1		0.7	5.1							5			XRF
Rothenberg 1990	Site 2 (Layer II)	105\1	39.3		1.6	30.8	4.5	0.7	5.9							3			XRF
Rothenberg 1990	Site 2 (Layer I)	102	23		1.5	30	1.7	0.8	19.9							1.4			XRF
Lupu 1970	Site 30A	27	35.1	0.4	1.9	52.2	1.1		5				1.7	0.3		2.7	0.2	0.1	Undefined	Published as Chalcholithic
