# Supplementary material for: Ancient technology and punctuated change: Detecting the emergence of the Edomite Kingdom in the Southern Levant
Source: PLoS One. 2019 Sep 18;14(9):e0221967. doi: 10.1371/journal.pone.0221967 (PMC6750566; doi:10.1371/journal.pone.0221967)
Supplement: S2 Dataset — (XLSX) [file pone.0221967.s005.xlsx]

## Sheet: Radiocarbon Data
Complete Radiocarbon Data from All Contexts Discussed in the Text
							Calibrated (Unmodeled BCE)				Calibrated (Modeled BCE)
							1σ		2σ		1σ		2σ
Site	Year	Context	Lab #	Sample Type	Material	Age BP	From	To	From	To	From	To	From	To	Source
KEN	2002	M1	OxA-12346	Charcoal	Tamarix sp.	2659±32	895	830	923	805	871	842	883	831	Levy et al. 2014
KEN	2002	M1	OxA-12347	Charcoal	Tamarix sp.	2746±35	917	839	976	815	872	847	886	837	Levy et al. 2014
KEN	2002	M1	OxA-17630	Charcoal	Retama raetam	2764±25	838	801	894	798	867	838	882	826	Levy et al. 2014
KEN	2006	M2a	OxA-17631	Charred Seed	Phoenix dactylifera	2676±26	894	826	906	809	902	883	906	861	Levy et al. 2014
KEN	2006	M2b	OxA-17632	Charred Seed	Phoenix dactylifera	2713±26	898	839	923	817	910	892	917	868	Levy et al. 2014
KEN	2006	M2a	OxA-17633	Charred Seed	Phoenix dactylifera	2734±25	974	898	1003	844	911	895	921	867	Levy et al. 2014
KEN	2006	M2b	OxA-17634	Charcoal	Haloxylon persicum	2783±25	974	858	998	842	906	889	911	864	Levy et al. 2014
KEN	2006	M2b	OxA-17635	Charcoal	Haloxylon persicum	2777±25	897	838	920	817	906	889	911	864	Levy et al. 2014
KEN	2006	M2b	OxA-17636	Charred Seed	Phoenix dactylifera	2732±25	1020	931	1108	911	909	892	915	867	Levy et al. 2014
KEN	2006	M1	OxA-17637	Charcoal	Phoenix dactylifera	2836±26	999	926	1036	902	876	851	889	842	Levy et al. 2014
KEN	2006	M2b	OxA-17638	Charred Seed	Phoenix dactylifera	2814±25	839	802	874	799	915	896	927	867	Levy et al. 2014
KEN	2006	M2a	OxA-17639	Charred Seed	Phoenix dactylifera	2678±26	970	849	994	838	880	855	892	846	Levy et al. 2014
KEN	2006	M3	OxA-17640	Charcoal	Tamarix sp.	2770±25	969	846	944	835	936	913	975	907	Levy et al. 2014
KEN	2006	M3	OxA-17641	Charcoal	Acacia sp.	2767±25	974	896	1001	844	930	908	971	899	Levy et al. 2014
KEN	2006	M3	OxA-17642	Charcoal	Tamarix sp.	2781±25	976	898	1003	846	932	911	972	904	Levy et al. 2014
KEN	2006	M4	OxA-17643	Charcoal	Tamarix sp.	2813±26	1001	927	1041	903	972	917	978	912	Levy et al. 2014
KEN	2006	M5a	OxA-17644	Charcoal	Tamarix sp.	2824±25	1008	932	1047	912	977	920	995	914	Levy et al. 2014
KEN	2006	M4	OxA-17645	Charcoal	Tamarix sp.	2747±25	913	843	972	827	926	906	970	895	Levy et al. 2014
KEN	2006	M3	OxA-17646	Charcoal	Tamarix sp.	2871±26	1112	1005	1129	936	1077	997	1115	943	Levy et al. 2014
KEN	2006	M5a	OxA-17647	Charcoal	Haloxylon persicum	2764±25	904	839	970	814	973	919	984	913	Levy et al. 2014
KEN	2006	M2	OxA-17702	Charcoal	Retama raetam	2740±30	991	904	1011	843	904	885	908	864	Levy et al. 2014
KEN	2006	M3	OxA-17703	Charred Seed	Phoenix dactylifera	2792±30	799	671	808	564	941	915	975	911	Levy et al. 2014
KEN	2006	M5a	OxA-19040	Charcoal	Retama raetam	2942±27	1371	1258	1389	1133	1215	1126	1257	1078	Levy et al. 2014
KEN	2006	M5b	OxA-19041	Charcoal	Indeterminate	3026±27	1373	1260	1391	1135	1287	1214	1378	1131	Levy et al. 2014
KEN	2002	A-2a	GrA-25311	Charcoal	Indeterminate	2710±35	894	821	917	803	908	878	926	871	Levy et al. 2014
KEN	2002	A-2a	GrA-25312	Charcoal	Acacia sp.	2670±35	886	798	897	794	899	869	922	863	Levy et al. 2014
KEN	2002	A-2b	GrA-25314	Charcoal	Indeterminate	2705±35	893	814	913	802	910	888	919	878	Levy et al. 2014
KEN	2002	A-2b	GrA-25315	Charcoal	Tamarisk sp.	2705±40	896	816	925	800	907	883	916	871	Levy et al. 2014
KEN	2002	A-2b	GrA-25316	Charcoal	Tamarisk sp.	2815±40	1010	1049	1257	1009	904	877	911	866	Levy et al. 2014
KEN	2002	A-3b	GrA-25318	Charcoal	Tamarisk sp.	2920±35	1191	1049	1257	1009	956	926	965	906	Levy et al. 2014
KEN	2002	A-4a	GrA-25320	Charcoal	Tamarisk sp.	2710±35	894	821	917	788	975	925	995	912	Levy et al. 2014
KEN	2002	A-3a	GrA-25321	Charcoal	Tamarisk sp.	2660±40	840	794	899	788	917	888	931	880	Levy et al. 2014
KEN	2002	A-3a	GrA-25322	Charcoal	Phoenix dactylifera	2680±40	892	801	905	794	915	895	925	885	Levy et al. 2014
KEN	2002	A-2a	GrA-25334	Charcoal	Indeterminate	2910±50	1191	1014	1265	935	891	859	920	855	Levy et al. 2014
KEN	2002	A-3b	GrA-25354	Charcoal	Tamarisk sp.	2880±50	1150	975	1251	919	943	914	954	901	Levy et al. 2014
KEN	2002	A-4a	OxA-12365	Charcoal	Indeterminate	2825±32	915	837	974	813	953	919	991	911	Levy et al. 2014
KEN	2002	A-3b	OxA-12366	Charcoal	Indeterminate	2783±31	1010	925	1109	899	946	916	980	909	Levy et al. 2014
KEN	2002	A-2b	OxA-12367	Charcoal	Indeterminate	2689±31	994	896	1005	841	901	871	908	861	Levy et al. 2014
KEN	2002	A-2a	OxA-12368	Charcoal	Indeterminate	2719±33	891	805	900	800	886	852	917	848	Levy et al. 2014
KEN	2006	A-3b	OxA-18798	Charcoal	Tamarisk sp.	2801±27	1019	926	1109	907	939	914	974	907	Levy et al. 2014
KEN	2006	A-2a	OxA-18968	Charcoal	Tamarisk sp.	2691±26	903	839	967	819	886	851	901	843	Levy et al. 2014
KEN	2006	A-2a	OxA-18969	Charcoal	Tamarisk sp.	2740±25	900	839	926	818	880	844	898	839	Levy et al. 2014
KEN	2006	A-2b	OxA-18970	Charcoal	Phoenix dactylifera	2737±26	898	838	924	814	896	866	906	854	Levy et al. 2014
KEN	2006	A-1b	OxA-18971	Charcoal	Tamarisk sp.	2733±26	895	837	917	815	876	838	897	833	Levy et al. 2014
KEN	2006	A-1b	OxA-18972	Charcoal	Tamarisk sp.	2728±25	893	823	904	809	874	832	896	826	Levy et al. 2014
KEN	2006	A-3b	OxA-18973	Charcoal	Tamarisk sp.	2711±26	1109	975	1120	932	932	911	969	903	Levy et al. 2014
KEN	2006	A-3b	OxA-18974	Charcoal	Phoenix dactylifera	2860±26	1111	977	1122	934	929	908	955	902	Levy et al. 2014
KEN	2006	A-3b	OxA-18975	Charcoal	Indeterminate	2812±25	998	925	1040	900	923	904	942	896	Levy et al. 2014
KEN	2006	A-3b	OxA-18976	Charcoal	Indeterminate	2812±27	993	914	1019	847	966	932	979	909	Levy et al. 2014
KEN	2006	A-2b	OxA-18977	Charcoal	Tamarisk sp.	2800±28	998	925	1040	900	897	857	903	850	Levy et al. 2014
KEN	2006	A-2a	OxA-19031	Charcoal	Tamarisk sp.	2784±28	997	900	1006	845	878	846	918	842	Levy et al. 2014
KEN	2006	A-2a	OxA-19032	Charcoal	Tamarisk sp.	2772±27	974	658	998	841	872	839	916	833	Levy et al. 2014
KEN	2006	F1a	OxA-19897	Charcoal	Indeterminate	2710±26	895	824	906	811	901	841	910	820	Levy et al. 2014
KEN	2006	F1a	OxA-18988	Charcoal	Indeterminate	2765±26	970	846	979	835	906	849	917	837	Levy et al. 2014
KEN	2006	F2a	OxA-18989	Charcoal	Indeterminate	2782±25	976	899	1004	846	937	900	976	870	Levy et al. 2014
KEN	2006	F2b	OxA-18990	Charcoal	Indeterminate	2831±26	1014	932	1071	907	983	916	1016	906	Levy et al. 2014
KEN	2006	F2a	OxA-19061	Charcoal	Phoenix dactylifera	2728±28	899	837	923	814	921	883	937	855	Levy et al. 2014
T30	2009	Layer 1 - Area S	IS26-S2-W1 AA86520	Twig	Wood	2705±35	895	816	915	804	912	836	970	808	Ben-Yosef et al. 2012
T30	2009	Layer 2	IS26-S2-g1-h AA86519	Pit	Olive	2814±34	1006	921	1070	847	971	910	1006	894	Ben-Yosef et al. 2012
T30	2009	Layer 2	IS26-S1-g1-b AA86518	Seed	Grape	2819±35	1011	921	1113	896	1009	946	1037	920	Ben-Yosef et al. 2012
T30	2009	Layer 2	IS26-S1-d3a AA86517	Seed	Date	2893±39	1129	1008	1252	941	1057	981	1101	938	Ben-Yosef et al. 2012
T30	2009	Layer 2	IS26-S1-w7 AA86516	Bark	Wood	2859±34	1111	946	1129	919	1108	1009	1130	943	Ben-Yosef et al. 2012
T30	2009		IS26C AA84739	Charcoal	Indeterminate	2852±50	1112	934	1208	899	NA	NA	NA	NA	Ben-Yosef et al. 2012
T30	2009		IS26F AA84740	Charcoal	Indeterminate	2882±38	1124	1006	1209	933	NA	NA	NA	NA	Ben-Yosef et al. 2012
T30	2009		IS26I AA84741	Charcoal	Indeterminate	2855±39	1111	939	1188	911	NA	NA	NA	NA	Ben-Yosef et al. 2012
T30	2009	Area S	IS26-EDM 188 AA86521	Charcoal	Indeterminate	2872±34	1116	1003	1192	928	1021	931	1051	917	Ben-Yosef et al. 2012
T30	2009	Layer 3 - Area L	IS26-EDM 261 AA86522	Charcoal	Indeterminate	2858±34	1111	943	1128	920	1033	946	1072	930	Ben-Yosef et al. 2012
T30	2009	Layer 4 - Area L	L813-B1604 AA86523	Charcoal	Indeterminate	2804±34	1000	916	1047	847	1050	976	1112	940	Ben-Yosef et al. 2012
T34	2013	Slag Mound	OxA-27964	Seed	Date	2847±27	1048	942	1108	925	1036	996	1056	948	Ben-Yosef 2016
T34	2013	Slag Mound	OxA-27965	Seed	Date	2876±25	1107	1010	1126	942	1026	992	1047	949	Ben-Yosef 2016
T34	2013	Slag Mound	OxA-27987	Seed	Date	2814±28	1001	929	1045	902	1015	987	1033	946	Ben-Yosef 2016
T34	2013	Slag Mound	OxA-27989	Seed	Date	2816±26	1002	931	1042	905	1010	982	1020	948	Ben-Yosef 2016
T34	2013	Slag Mound	OxA-27924	Seed	Olive	2855±35	1074	940	1122	919	1005	975	1012	944	Ben-Yosef 2016
T34	2013	Slag Mound	OxA-28010	Seed	Date	2846±27	1047	942	1108	924	1005	975	1012	943	Ben-Yosef 2016
T34	2013	Slag Mound	OxA-27988	Seed	Date	2831±28	1016	931	1072	907	1003	967	1007	936	Ben-Yosef 2016
T34	2013	Slag Mound	OxA-27963	Seed	Date	2818±27	1004	930	1045	906	1000	939	1005	927	Ben-Yosef 2016
T34	2013	Slag Mound	OxA-27692	Seed	Date	2800±24	980	916	1016	896	997	932	1003	917	Ben-Yosef 2016
T3	2016	Room 2 Layer 2	OxA-30693	Kernel	Date	2936±25	1209	1111	1219	1049	1156	1142	1181	1141	Yagel, Ben-Yosef, and Craddock 2016
T3	2016	Room 8 Layer 2	OxA-30694	Kernel	Date	2926±24	1192	1057	1214	1041	1156	1143	1181	1141	Yagel, Ben-Yosef, and Craddock 2016
T3	2016	Room 8 Layer 5	OxA-30695	Grain	Grain	2923±25	1191	1055	1212	1031	1167	1143	1199	1142	Yagel, Ben-Yosef, and Craddock 2016
KAJ	2006	A1A - Top of slag mound	OxA-19033	Charcoal	Tamarix sp.	2864±28	1113	997	1127	924	996	943	1011	936	Ben-Yosef et al. 2010
KAJ	2006	A3 -Fill in slag mound	OxA-19035	Charred Seed	Phoenix dactylifera	2799±26	994	915	1016	854	1010	980	1019	960	Ben-Yosef et al. 2010
KAJ	2006	A3 -Fill in slag mound	OxA-19030	Charred Seed	Phoenix dactylifera	2815±36	1108	934	1083	850	1004	969	1016	951	Ben-Yosef et al. 2010
KAJ	2006	A4 - Occupation phase of slag mound	OxA-19036	Charcoal	Tamarix sp.	2803±26	995	919	1025	859	1015	990	1031	970	Ben-Yosef et al. 2010
KAJ	2006	A5 - Fill in slag mound	OxA-19037	Charred Seed	Phoenix dactylifera	2902±27	1128	1026	1207	1006	1031	1003	1064	993	Ben-Yosef et al. 2010
KAJ	2006	A6 - Occupation above bedrock	OxA-19038	Charcoal	Phoenix dactylifera	2880±26	1113	1012	1189	945	1056	1011	1103	1004	Ben-Yosef et al. 2010
KAJ	2006	A6 - Occupation above bedrock	OxA-19089	Charcoal	Indeterminate	2884±27	1114	1016	1192	949	1044	1008	1081	1001	Ben-Yosef et al. 2010
KAJ	2014	C3 - Bottom of Slag Mound	AA105756 X28658	entire twig	Retama raeta	2873±33	1111	1005	1130	931	1088	1001	1127	942	Unpublished
KAJ	2014	C2 - Middle of Slag Mound, Occupation phase	AA105764 X28666	entire twig	Tamarix sp.	2852±30	1054	940	1112	928	1037	942	1067	922	Unpublished
KAJ	2014	C1 - Top of Slag Mound	AA105765 X28667	whole seed	Phoenix dactylifera	2749±47	968	832	1001	813	997	876	1012	827	Unpublished
