# Supplementary material for: Ancient technology and punctuated change: Detecting the emergence of the Edomite Kingdom in the Southern Levant
Source: PLoS One. 2019 Sep 18;14(9):e0221967. doi: 10.1371/journal.pone.0221967 (PMC6750566; doi:10.1371/journal.pone.0221967)
Supplement: S3 Dataset — (XLSX) [file pone.0221967.s006.xlsx]

## Sheet: Slag Data
Complete Elemental Data from All Sites
Site	Layer	Sample	Na	Mg	Al	Si	K	Ca	Ti	Mn	Fe	Ni	Cu	Zn	Sr	Ba	Pb	Method	Comments
KEN	A2a	L170-1 (insecure)			5.13874	34.8302	1.8059	5.28854	0.193972	27.1071	2.66019	0.0694181	4.11157	0.0984133		0.0220566	0.726079	pXRF	Outlier
KEN	A2b	L174-1			4.67643	33.6264	1.80828	3.26426	0.233503	37.9608	3.7204	0.0659634	0.748955	0.0704433		1.37369	0.538606	pXRF
KEN	A2b	L193-1			4.60822	35.1128	2.53005	10.6356	0.190864	31.0154	3.93928	0.0817598	0.417781	0.0222433		0	0.0352086	pXRF
KEN	A2b-A3	L180-1			4.78874	29.972	2.37116	8.68373	0.256907	37.4705	2.52022	0.0714012	0.769601	0.0270497		1.80808	0.182874	pXRF
KEN	A2b-A3	L180-1-C			4.74029	29.1483	2.48767	6.71723	0.313746	42.6341	3.10491	0.0712879	0.657136	0.0314887		1.94339	0.119835	pXRF
KEN	A2a-A2b-A3?	L192-1			4.45265	30.7829	3.81909	7.65641	0.187596	42.4156	2.34277	0.0687924	0.35455	0.0115744		0.27107	0.0404152	pXRF
KEN	F2a	L816-1			4.30636	34.022	2.80517	6.53509	0.192202	42.0717	2.09093	0.077499	0.265205	0.017202		0.487211	0.0289529	pXRF
KEN	F2a	L842-1			3.99002	28.8044	4.24224	8.30024	0.189358	43.0394	3.26876	0.0688617	0.351325	0.0198194		0.256953	0.0247988	pXRF
KEN	F2a	L859-1			4.28414	30.0634	1.19687	7.35312	0.187283	36.2609	2.81708	0.06784	0.539787	0.0442486		0.550449	0.121976	pXRF
KEN	F2a	L860-1			4.94126	34.9481	1.01867	3.02151	0.249102	39.7472	1.86381	0.0721171	0.400061	0.0272498		1.44552	0.240573	pXRF
KEN	F2a	L860-1-C			4.93039	33.817	0.846772	3.504	0.251707	40.5326	1.8141	0.0807469	0.328394	0.0239979		1.38707	0.0894338	pXRF
KEN	F2a	L893-1			4.47486	36.192	2.56564	10.9057	0.188543	nd	nd	nd	nd	nd		0.131224	nd	pXRF
KEN	M1	10482			4.18484	31.1881	2.33892	7.97967	0.192321	43.1862	4.08195	0.0618299	0.458049	0.034562		0.388217	0.0288862	pXRF
KEN	M1	10483			4.75128	30.0175	1.53257	10.0033	0.206387	40.797	4.78733	0.0708478	0.650592	0.0695394		0.76932	0.178605	pXRF
KEN	M1	10250			4.72353	41.2155	3.29232	7.23592	0.189726	30.7326	6.89453	0.0861802	0.331211	0.0173847		0	0.029421	pXRF
KEN	M1-M2	10484			4.31131	35.6474	2.42456	5.36685	0.188033	37.0059	6.82059	0.082853	0.254768	0.0147729		0.00234632	0.0172343	pXRF
KEN	M1-M2	10485			3.99053	39.2001	2.74936	5.66015	0.187066	36.6789	6.18258	0.07563	0.271807	0.0142389		0.0619313	0.0159443	pXRF
KEN	M1-M2	10487			4.09337	32.4144	2.71811	8.00242	0.187801	41.7241	3.29972	0.0668699	0.868702	0.0614618		0.218206	0.0566897	pXRF
KEN	M2 (upper)	10478 (insecure)			4.64259	33.9187	2.18098	7.2983	0.187214	30.0695	7.3683	0.0572195	1.64131	0.0596592		0.342696	0.189001	pXRF	Outlier
KEN	M2 (upper)	10479			4.60187	33.8498	2.63144	4.90473	0.187192	34.7562	3.72285	0.0859306	0.902891	0.0824404		0.00679063	0.23108	pXRF
KEN	M2 (upper)	10481			4.32531	30.4801	1.90134	6.60906	0.201893	43.9043	3.56844	0.0611001	0.843097	0.0861053		0.581535	0.0591618	pXRF
KEN	M2 (upper)	10486			4.49941	32.1297	2.47168	8.21736	0.192039	44.0418	2.39716	0.0861399	1.053	0.0222643		0.604856	0.010264	pXRF
KEN	M2 (upper)	10488			4.56563	32.518	1.66209	7.40882	0.188448	39.8523	1.89646	0.0695546	0.799835	0.0465086		0.477057	0.014699	pXRF
KEN	M2 (upper)	10489			4.29803	29.94	3.29176	11.7374	0.187044	37.7059	2.5786	0.0754251	0.455886	0.0370411		0.0853016	0.016124	pXRF
KEN	M2 (upper)	10256			4.57036	34.2013	3.59874	11.5842	0.187709	34.5913	1.76562	0.0698709	0.534419	0.0303412		0.433159	0.104345	pXRF
KEN	M2	10475			4.57196	34.4694	4.4646	9.53059	0.187864	35.1564	4.66865	0.0828927	0.651713	0.0746747		0.00984538	0.141025	pXRF
KEN	M2	10476			4.21219	30.7332	3.57582	9.55862	0.188213	36.8951	3.7997	0.0670652	1.1318	0.0674417		0.55017	0.361046	pXRF
KEN	M2	10477			4.6575	31.825	3.72847	9.57357	0.18782	37.0247	3.87106	0.0746881	0.591471	0.0590617		0.0886026	0.311247	pXRF
KEN	M2	10490			4.26479	30.8817	3.57886	7.23345	0.188667	42.8421	4.43301	0.0642749	0.791323	0.0881474		0.134282	0.314676	pXRF
KEN	M2	10492			4.15062	32.1737	2.71318	8.52532	0.191616	40.388	3.27166	0.069528	0.824925	0.0873055		0.617707	0.116163	pXRF
KEN	M2	10493 (insecure)			4.3543	35.0088	2.77172	11.7001	0.190977	30.236	5.12622	0.0670135	2.13831	0.118979		0	0.161357	pXRF	Outlier
KEN	M2	L602-1			4.53098	35.6354	4.27212	6.68709	0.187515	42.3959	2.40694	0.0745738	0.391899	0.0307328		0.137424	0.0211124	pXRF
KEN	M2	L606-1			4.65507	35.5774	4.01302	8.02927	0.187464	34.2009	3.50757	0.0753586	0.721356	0.0581157		0.393616	0.407588	pXRF
KEN	M2	L615-1			4.19972	34.8087	2.03053	8.69419	0.192006	40.7624	3.25772	0.0732811	0.421797	0.025622		0	0.0176477	pXRF
KEN	M2	L620-2			4.37455	31.3661	3.19386	10.8536	0.19344	39.6259	4.08645	0.0631822	0.503326	0.0542479		0.805371	0.0300237	pXRF
KEN	M2	L620-1			4.35093	35.0171	3.35723	8.49734	0.186962	40.0135	3.33003	0.0649751	0.434908	0.0377406		0.274893	0.12562	pXRF
KEN	M2	L622-1			4.27623	37.4608	3.01313	9.37913	0.190285	33.2763	7.17046	0.0602495	0.804397	0.0552253		0	0.0967807	pXRF
KEN	M2	10259			4.28562	34.1158	3.83813	10.3569	0.18892	34.7419	2.61046	0.0681976	0.798035	0.0547939		0.0538182	0.237601	pXRF
KEN	M2	10260			4.279	34.405	3.69983	10.9971	0.188633	30.2651	2.79191	0.075545	0.673636	0.0473791		0.0514502	0.217897	pXRF
KEN	M2	10262			4.43902	33.6253	3.0124	10.5991	0.18713	37.6825	4.62277	0.068302	1.06318	0.0895856		0.257184	0.667586	pXRF
KEN	M2 (lower)	MAR0904			4.97594	30.8336	4.03581	9.4863	0.186972	36.8244	2.15517	0.063945	0.535272	0.0606989		0.284379	0.24998	pXRF
KEN	M2-M3 (M3 upper)	10267			4.22405	30.5527	4.72651	10.932	0.189079	37.1803	1.72528	0.0690214	0.345599	0.0176014		0.106544	0.0729649	pXRF
KEN	M3 (upper)	10270			4.62825	38.3272	3.06272	6.22981	0.187513	32.9816	4.88333	0.0726156	1.26786	0.0780945		0.387087	0.210697	pXRF
KEN	M3 (upper)	10474			4.57385	36.3667	3.59271	9.748	0.188569	33.3963	3.25582	0.0763013	0.318621	0.0332841		0.149315	0.0480791	pXRF
KEN	M3 (upper)	10468			3.90226	29.1144	3.43371	10.7098	0.208044	40.1952	1.55093	0.0700196	0.45418	0.0240347		0.910539	0.147328	pXRF
KEN	M3	10460			4.0247	32.2467	3.75634	7.72126	0.197283	37.9461	2.53746	0.0729547	1.07302	0.0607187		0.828301	0.120109	pXRF
KEN	M3	10461			4.44129	31.691	3.9052	6.33363	0.190863	39.6215	2.01874	0.0789198	0.846469	0.0433846		0.599392	0.124872	pXRF
KEN	M3	10462			4.34043	32.806	2.37513	7.61434	0.193423	38.0255	4.66603	0.0651819	1.28904	0.0710225		0.665653	0.0738917	pXRF
KEN	M3	10480			4.14137	29.0429	3.06037	9.74329	0.190414	38.3997	4.87962	0.0601333	1.48781	0.0649938		0.589153	0.101698	pXRF
KEN	M3	L629-1			3.96787	31.7304	2.92325	4.8496	0.233332	38.8912	4.67838	0.0513113	1.70825	0.0768023		1.37883	0.448829	pXRF
KEN	M3	L647-1			3.89997	32.5379	2.67671	7.1464	0.216134	38.7584	3.64696	0.0560842	2.18565	0.0842967		0.946222	0.349201	pXRF
KEN	M3	L659-1			4.74599	32.4875	2.97082	10.6297	0.188453	33.6336	4.61803	0.0846399	1.0037	0.114543		0.424642	0.235972	pXRF
KEN	M3	L660-1			4.68158	34.5116	3.97058	9.48347	0.186963	35.4024	1.92027	0.0855452	0.651235	0.0343449		0.385838	0.0506455	pXRF
KEN	M3 (lower)	10463			5.48846	44.804	4.84286	1.14815	0.234783	5.90901	2.04658	0.0976209	0.318033	0.010531		0	0.0477257	pXRF
KEN	M3 (lower)	10465			4.85892	34.6347	2.30239	3.64421	0.194628	40.4861	2.17656	0.0754248	0.583756	0.0493811		0.834936	0.269196	pXRF
KEN	M3 (lower)	10467			4.50107	36.8809	3.5646	3.32788	0.189498	43.1653	1.95675	0.0701158	1.42626	0.0743812		0.297857	0.332926	pXRF
KEN	M3 (lower)	10471			4.14588	29.3938	4.58332	6.05206	0.201402	42.1396	2.61432	0.0740567	1.23231	0.0609647		0.6909	0.152136	pXRF
KEN	M3 (lower)	L666-2			4.73239	35.7283	2.87095	3.64976	0.205185	41.9877	3.58799	0.0630567	1.95919	0.12395		0.752231	0.652437	pXRF
KEN	M3 (lower)	L666-1			4.58575	37.1652	2.9859	3.69699	0.210908	41.1857	3.44128	0.0606172	1.77962	0.110214		0.694458	0.56133	pXRF
KEN	M3 (lower)	10277			4.34635	35.4893	2.54041	7.10997	0.197563	40.6513	5.33378	0.0850912	0.434531	0.0381082		0.792895	0.0319524	pXRF
KEN	M3 (lower)	10280			4.02728	31.455	2.19041	3.56621	0.187189	40.4787	2.5208	0.0808195	1.63204	0.0638512		0.279974	0.407513	pXRF
KEN	M4?	10282			4.64832	34.5469	1.80065	2.88117	0.190586	41.3914	2.16158	0.0850976	2.43407	0.0810368		0.244888	0.480378	pXRF
KEN	M4	10283			4.94595	35.7135	3.07522	7.56752	0.187778	36.247	1.90539	0.0708437	1.32805	0.0738638		0.545566	0.567696	pXRF
KEN	M4	L667-1			3.93715	36.0249	2.83374	2.65416	0.197861	43.2712	4.41004	0.062933	1.372	0.0867391		0.555326	0.311719	pXRF
KEN	M4	L670-1			4.66743	32.8232	2.03051	6.26661	0.187308	35.7372	2.79295	0.0591473	1.7654	0.0739866		0.0597271	0.0762222	pXRF
KEN	M4	L670-2			4.65468	31.3747	3.32043	4.9419	0.190127	39.4118	1.89808	0.0755517	1.46254	0.0474393		0.489642	0.290391	pXRF
KEN	M4	L671-1			4.06638	31.0184	4.41611	8.65434	0.186958	36.6691	3.67212	0.0731156	0.950057	0.0553895		0.459388	0.0830441	pXRF
KEN	M4	10464			5.4486	34.7942	2.82028	13.029	0.191853	26.8196	2.56257	0.0739687	1.6206	0.0567498		0	0.129626	pXRF
KEN	M4 (lower)	10466			4.91738	42.9988	3.12039	5.47859	0.190615	24.3882	3.02037	0.0746248	1.76963	0.0521833		0	0.07044	pXRF
KEN	M5	L674-1			4.38681	30.1388	3.8893	11.6874	0.187832	31.0318	2.45836	0.0702092	0.730219	0.0419213		0.638818	0.015914	pXRF
KAJ	A1a	3275			4.98754	34.8928	2.90353	10.8635	0.189617	28.8134	1.99829	0.0756659	1.01762	0.0404784		0.0286625	0.0428031	pXRF
KAJ	A1a	3262			4.81129	32.5748	3.8522	7.61524	0.196809	38.7558	3.6758	0.0806978	0.598879	0.0436177		0.856747	0.0308333	pXRF
KAJ	A1a	3263			5.06258	32.8968	3.02317	10.1646	0.187846	39.6264	2.1508	0.0785302	0.634914	0.0421457		0.406612	0.0270297	pXRF
KAJ	A1a	3278			4.47933	34.4505	2.14035	8.59022	0.18707	21.2334	2.11831	0.0844299	1.74161	0.0562759		0.491237	0.0551417	pXRF
KAJ	A1	3261			5.02547	33.7709	2.78348	7.53555	0.187967	34.0627	3.27913	0.0731146	0.558675	0.047519		0.580796	0.0252896	pXRF
KAJ	A3	3283			5.44178	35.6661	3.18019	11.0093	0.189804	30.049	2.07868	0.0795716	2.59289	0.0729024		0.259164	0.0912127	pXRF
KAJ	A3	3276			4.20286	33.3674	2.0807	4.00992	0.189434	33.3667	2.47027	0.0735297	2.6536	0.0760292		0.541696	0.10752	pXRF
KAJ	A3	3287			4.59505	31.9675	3.58003	11.5957	0.187517	21.0578	2.19793	0.0680125	1.85274	0.0599184		0.309604	0.0556231	pXRF
KAJ	A3	3266			4.38803	29.4367	3.6629	11.6335	0.19063	29.3763	4.31132	0.0748419	0.584842	0.0362367		0.790407	0.0209373	pXRF
KAJ	A3	3267			4.42363	31.0404	2.88045	3.7103	0.240122	31.6213	1.80483	0.0692591	0.657639	0.0374015		1.86556	0.0328544	pXRF
KAJ	A4	3281			4.98519	36.0832	3.33405	8.1809	0.188687	31.3533	1.49407	0.0745435	1.10931	0.0448024		0.148197	0.0410491	pXRF
KAJ	A5	3282			4.67749	35.4033	3.70889	9.08296	0.186976	29.1883	2.21853	0.0830379	1.54172	0.0700228		0.321881	0.0775595	pXRF
KAJ	A5	3280			4.83014	32.5217	3.93352	10.5134	0.186956	32.9889	1.43541	0.0718932	1.55927	0.0485444		0.326413	0.0289001	pXRF
KAJ	A5	3279			3.95871	29.3552	3.79609	11.0492	0.189747	37.1303	2.11898	0.0664502	1.90248	0.0773887		0.0561945	0.0616527	pXRF
KAJ	A5	3277			4.09203	33.1666	4.43938	8.45919	0.203972	38.9947	2.12637	0.0870125	0.870466	0.0416623		0.914844	0.0494109	pXRF
KAJ	A5	3269			4.10354	34.6718	3.30735	3.84583	0.229974	35.1157	4.31774	0.0570262	4.25152	0.124466		1.49968	0.242664	pXRF
KAJ	A5	3274			4.86848	39.2706	2.96879	9.46096	0.187222	23.0669	2.0853	0.0804893	1.92591	0.0669644		0.457078	0.0930599	pXRF
KAJ	A5 (bottom)	3272			4.8936	33.9016	3.18522	13.0535	0.188679	28.9057	1.45839	0.0837255	0.555791	0.0339992		0.367204	0.0739061	pXRF
KAJ	A6	3271			5.71489	31.5342	2.51605	11.7418	0.211949	39.522	5.35777	0.0584553	2.06454	0.0981791		1.32502	0.222646	pXRF
KAJ	C1	B10314_1				43.01	3.49759	15.2002	0.316301	37.2039	2.5708	0.068174	0.385864	0.0273363		0.0333919	0.0461076	pXRF	Si value includes Al and is based on calculation from bulk
KAJ	C1	B10314_2				32.5527	2.50641	5.61068	0.315994	43.0831	3.178	0.062738	0.325148	0.0231796		0.631076	0.115821	pXRF	Si value includes Al and is based on calculation from bulk
KAJ	C1	B10338_1				27.6523	5.34768	11.8361	0.340246	50.35	2.73557	0.0560343	1.43645	0.0958642		1.06579	0.0532254	pXRF	Si value includes Al and is based on calculation from bulk
KAJ	C1	B10338_2				27.8702	2.57827	12.0194	0.312052	27.4165	2.72521	0.0556151	1.43924	0.0957207		0.572291	0.0593986	pXRF	Si value includes Al and is based on calculation from bulk
KAJ	C3	B10233				43.6654	4.57277	15.4601	0.316518	47.9427	2.72607	0.0604817	3.1558	0.0998942		0.0654665	0.0664123	pXRF	Si value includes Al and is based on calculation from bulk; sample not associated with radiocaron dating, excluded from Figure 3
KAJ	C3	B10234				49.5184	4.73832	14.7103	0.311861	42.5953	1.84666	0.0625421	3.14396	0.106539		0.380271	0.0311312	pXRF	Si value includes Al and is based on calculation from bulk; sample not associated with radiocaron dating, excluded from Figure 3
KAJ	C3	B10235				42.6394	4.01619	11.4467	0.31475	40.4834	1.92212	0.0585351	3.52627	0.110302		0.17265	0.0442181	pXRF	Si value includes Al and is based on calculation from bulk; sample not associated with radiocaron dating, excluded from Figure 3
KAJ	C3	B10236				54.0293	4.46773	12.7089	0.311895	37.6879	2.85414	0.0668675	5.24097	0.114129		0.374991	0.0835471	pXRF	Si value includes Al and is based on calculation from bulk; sample not associated with radiocaron dating, excluded from Figure 3
KAJ	C3	B10237				54.8154	3.83085	15.4042	0.316612	38.7993	2.67423	0.0689589	3.73824	0.0952896		0.301927	0.0982543	pXRF	Si value includes Al and is based on calculation from bulk; sample not associated with radiocaron dating, excluded from Figure 3
KAJ	C3	B10238				47.5463	3.35298	10.5437	0.313547	43.9817	4.2186	0.0668565	3.54559	0.0966551		0.676627	0.027242	pXRF	Si value includes Al and is based on calculation from bulk; sample not associated with radiocaron dating, excluded from Figure 3
KAJ	C3	B10502				58.3197	4.64036	10.6552	0.328296	50.0415	4.72892	0.0711657	2.33493	0.0739321		0.99811	0.0332136	pXRF	Si value includes Al and is based on calculation from bulk
KAJ	C3	B001				41.8909	3.64171	14.2222	0.313347	51.1657	2.767	0.0574492	3.45971	0.105033		0.473703	0.0291164	pXRF	Si value includes Al and is based on calculation from bulk; sample not associated with radiocaron dating, excluded from Figure 3
T30	L-1	L809-1			5.07761	38.5275	0.55277	5.03016	0.255926	39.9441	4.0555	0.0694299	0.366577	0.0230108		1.70377	0.0592523	pXRF
T30	L-1	S2-510			4.78219	35.6344	0.886915	9.8388	0.237425	36.9114	4.2529	0.0869164	0.239861	0.0174723		1.37826	0.0851621	pXRF
T30	L-1	S2-51			4.82298	43.924	1.22316	4.43014	0.19423	35.3172	5.03998	0.0799057	0.60766	0.0252435		0.811586	0.144745	pXRF
T30	L-1	S2-52			4.34611	38.6389	1.11316	6.40758	0.218451	39.0286	4.02457	0.076375	0.384834	0.0133347		1.14287	0.12864	pXRF
T30	L-2	L902-1			4.84842	35.9337	0.370382	8.65188	0.188047	2.16167	23.4302	0.0171462	0.86673	0.0982265		0	0.0133605	pXRF
T30	L-2	L903-1			3.91766	36.2866	0.316647	2.42821	0.18781	1.63009	48.2692	0.00283852	2.91356	0.1255		0	0.0735456	pXRF
T30	L-2	L907-1			4.08833	42.9111	0.560939	4.50941	0.186994	2.30155	12.7626	0.00848181	1.38319	0.0518773		0.159464	0.0700447	pXRF
T30	L-2	L808-1			4.07656	38.282	0.133793	4.33639	0.197165	0.00508839	40.0415	0.00542977	1.0527	0.0650424		0.558454	0.0419099	pXRF
T3		oyT3;02;P	0.169	0.413	0.294		0.055	0.28		0.056	22.66		0.791		0.029		0.042	MS
T3		oyT3;03;C	0.387	0.734	0.576		0.531	2.357		0.088	37.48		1.96		0.029		0.51	OES
T3		oyT3;04.1;C/P	0.319	1.329	0.82		0.696	6.874		4.846	11.18		3.691		0.095		0.091	MS
T3		oyT3;04.2;C/P	0.072	0.183	0.255		0.182	0.369		0.523	7.848		0.292		0.01		0.023	MS
T3		oyT3;04.3;C/P	0.25	0.612	0.61		0.126	0.901		3.206	24.74		2.186		0.04		0.059	MS
T3		oyT3;04.4;C/P	0.18	0.436	0.423		0.219	1.927		0.81	19.65		0.218		0.056		0.114	MS
T3		oyT3;05.1;C/P	0.237	0.572	0.629		0.47	2.346		3.901	8.797		0.388		0.081		0.257	MS
T3		oyT3;05.2;C/P	0.184	0.853	0.902		0.298	1.944		4.949	14.61		0.276		0.071		0.02	MS
T3		oyT3;05.3;C/P	0.166	0.701	0.741		0.563	2.869		1.65	10.4		0.481		0.062		0.023	MS
T3		oyT3;05.4;C/P	0.247	0.304	0.283		0.427	1.741		0.045	15.24		2.116		0.031		0.297	MS
T3		oyT3;06.1;C/P	0.579	1.083	4.399		0.794	1.1		0.272	4.481		0.474		0.072		0.017	MS
T3		oyT3;06.2;C/P	0.201	0.84	0.884		0.525	3.799		2.258	29.45		0.893		0.071		0.192	OES
T3		oyT3;06.3;C/P	0.113	0.367	4.382		1.286	2.274		0.069	5.344		0.747		0.067		0.079	MS
T3		oyT3;06.4;C/P	0.168	0.255	0.567		0.539			2.296	32.04		2.002		0.078		0.407	OES
T3		oyT3;07.1;C/P	0.458	1.004	0.701		0.706	5.055		2.179	33.72		3.159		0.064		0.593	OES
T3		oyT3;07.2;C/P	0.182	0.388	0.536		0.436	2.553		1.486	14.85		0.687		0.071		0.122	MS
T3		oyT3;07.3;C/P	0.225	0.461	0.501		0.433	2.335		0.124	20.82		0.973		0.034		0.399	MS
T3		oyT3;07.4;C/P	0.137	0.45	1.04		0.761	4.141		8.287	22.43		1.746		0.222		0.037	OES
T3		oyT3;08;C/P	0.144	0.746	0.86		0.404	1.968		4.347	12.51		0.446		0.061		0.017	MS
T3		oyT3;09;C/P	0.325	0.792	0.665		0.211	1.5		1.049	21.4		0.713		0.061		0.024	MS
T3		oyT3;10;C/P	0.189	0.455	0.499		0.683	1.848		1.511	20.74		1.556		0.045		0.251	MS
T3		oyT3;11;C/P	0.087	0.249	0.623		0.095	3.673		0.061	16.4		0.491		0.067		0.097	MS
T3		oyT3;12;C/P	0.168	0.351	0.657		0.278	2.314		0.769	16.13		0.703		0.048		0.139	MS
T3		oyT3;13;C/P	0.087	0.697	0.403		0.229	6.404		0.055	12.96		0.478		0.041		0.064	MS
T3		oyT3-14-C/P	0.358	1.133	0.795		0.154	0.842		2.293	16.6		1.415		0.067		0.018	MS
T3		oyT3-15-C/P	0.088	0.338	0.647		0.096	1.787		0.085	15.09		0.343		0.063		0.005	MS
T3		oyT3-16-C/P	0.175	0.289	0.775		0.08	0.484		0.097	16.47		0.478		0.081		0.005	MS
T3		oyT3-17-C/P	0.374	0.861	0.74		0.115	0.646		2.091	19.28		0.738		0.053		0.022	MS
T34		oyT34;10.1;C/P	0.064	0.861	0.954		0.295			3.115	28.97		1.131		0.048		0.033	OES
T34		oyT34;11/1;C/P	0.099	0.304	0.922		0.306			4.354	26.7		1.645		0.057		0.023	OES
T34		oyT34;11/2;C/P	0.203	0.576	0.779		0.059	0.51		3.276	23.37		0.898		0.038		0.034	MS
T34		oyT34;12.1;C/p	0.191	0.263	1.065		0.654	3.134		3.335	30.76		1.487		0.113		0.155	OES
T34		oyT34;12/2;C/P	0.223	0.261	1.004		0.106	0.55		3.09	20.76		1.218		0.051		0.097	MS
T34		oyT34;13.1;C/P	0.278	0.795	0.697		0.51	2.753		2.437	29.6		2.118		0.042		0.111	OES
T34		oyT34;13/2;C/P	0.158	0.79	0.698		0.024	0.626		3.082	22.39		2.284		0.072		0.012	MS
T34		oyT34;14.1;C/P	0.27	0.669	0.703		0.438	2.339		3.169	28.95		2.058		0.043		0.069	OES
T34		oyT34;14/2;C/P	0.213	0.693	0.694		0.086	0.817		3.227	20.29		1.328		0.059		0.026	MS
T34		oyT34;15/1;C/P	0.194	0.482	0.825		0.081	0.361		4.319	20.08		0.528		0.045		0.013	MS
T34		oyT34;15/2;C/P	0.195	0.608	0.584		0.12	0.82		2.987	20.52		1.18		0.078		0.031	MS
T34		oyT34;16/1;C/P	0.384	0.53	1.221		0.216	1.978		0.253	20.87		0.561		0.061		0.015	MS
T34		oyT34;16/2;C/P	0.386	0.828	1.437		0.133	0.714		1.434	22.12		0.704		0.077		0.006	MS
T34		oyT34;17/1;C/P	0.094	0.782	0.648		0.058	0.538		0.103	24.14		0.366		0.052		0.035	MS
T34		oyT34;17/2;C/P	0.111	0.756	0.622		0.14	1.634		0.098	14.78		0.786		0.067		0.053	MS
T34		oyT34;18/1;C/P	0.09	0.498	0.633		0.05	0.324		0.161	25.18		0.822		0.035		0.033	MS
T34		oyT34;18/2;C/P	0.103	0.51	0.783		0.047	0.432		0.138	25.09		1.082		0.038		0.082	MS
